# Supplementary material for: miR-1272 Exerts Tumor-Suppressive Functions in Prostate Cancer via HIP1 Suppression
Source: PubMed Central journal article supplement (PMC7072756; doi:10.3390/cells9020435), 2020-02-13
Supplement: cells-09-00435-s001.pdf [file cells-09-00435-s001.pdf]

## Supplementary Figures

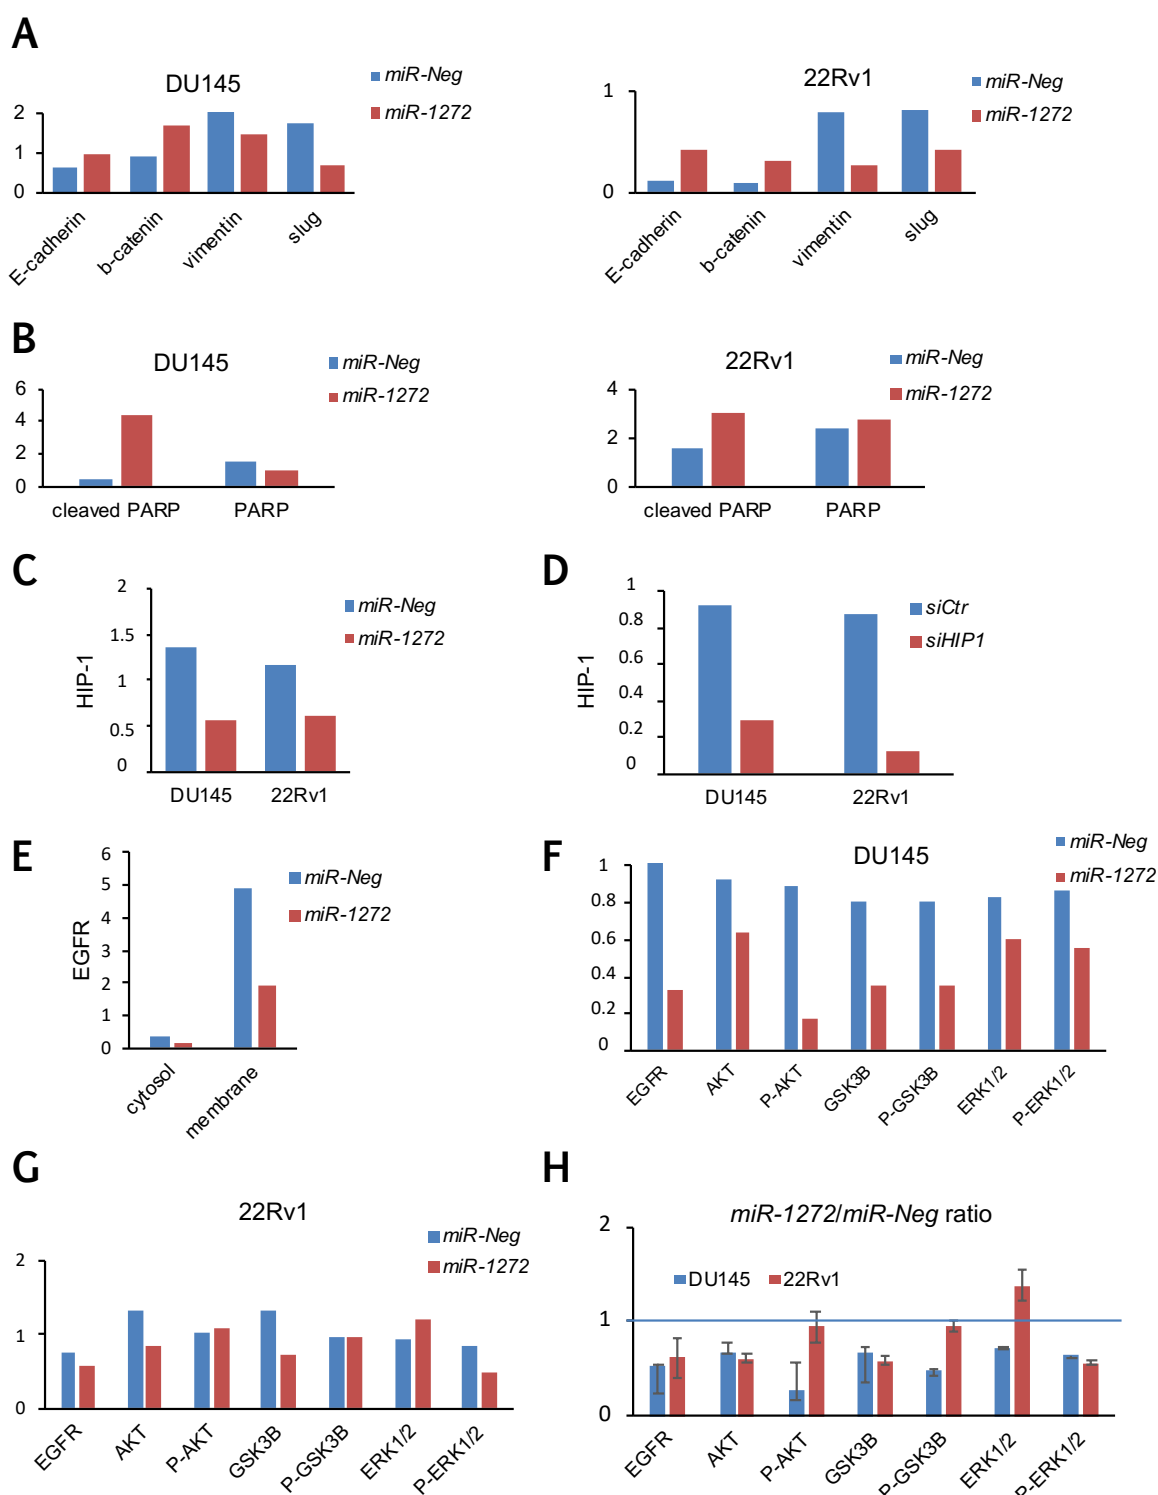

### Supplementary Figure 1

The figure reports quantification of all western blots. Densitometry data are reported as raw normalized values (arbitrary units) towards the loading control of each blot. **(A)** related to Fig. 1G. Loading control:  $\beta$ -tubulin; **(B)** related to Fig. 2C. Loading control:  $\beta$ -tubulin; **(C)** related to Fig. 3C. Loading control:  $\beta$ -tubulin; **(D)** related to Fig. 3I. Loading control:  $\beta$ -tubulin; **(E)** related to Fig. 4A. Loading control:  $\beta$ -tubulin for cytoplasm and caveolin-1 for the membrane; **(F)** related to Fig. 4B. Loading control: vinculin; **(G)** related to Supplementary Fig. 3B. Loading control: vinculin; **(H)**  $miR-1272/miR-Neg$  ratios for proteins shown in Fig. 4B and Supplementary Fig. 3B, reported as mean + sd from 3 independent western blots.

**A**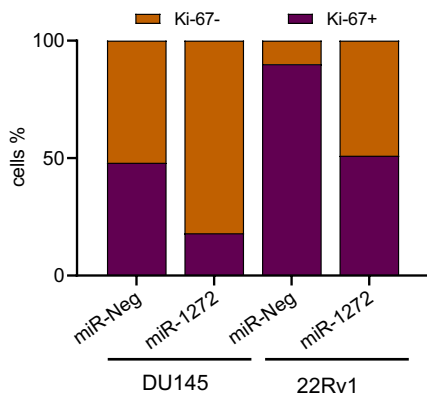**B**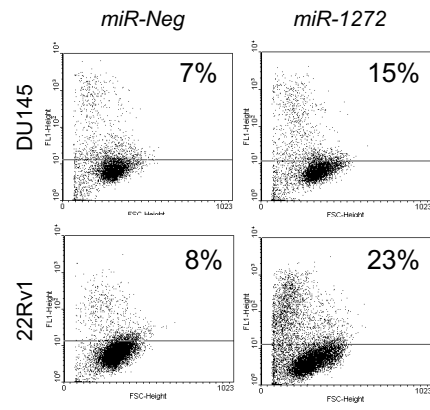**Supplementary Figure 2**

Plots indicating the percentages of (A) Ki-67-positive and negative cells and (B) TUNEL-positive cells in *miR-Neg* and *miR-1272*-transfected DU145 and 22Rv1 cells.

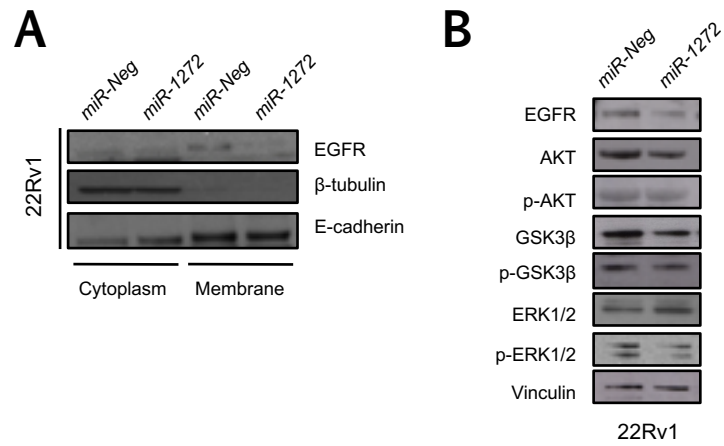

**Supplementary Figure 3**

(A) Representative immunoblotting showing protein levels of cytoplasmic and membrane-associated EGFR in *miR-Neg* and *miR-1272*-transfected 22Rv1 cells.  $\beta$ -tubulin and E-cadherin were used as controls for cytoplasm/membrane fractionation. (B) Representative immunoblotting showing protein levels of EGFR/AKT/GSK3 $\beta$ /ERK pathway members in *miR-Neg* and *miR-1272*-transfected 22Rv1 cells. Vinculin was used as endogenous control.
